# Supplementary material for: Nutrition Literacy among Adolescents and Its Association with Eating Habits and BMI in Tripoli, Lebanon
Source: PubMed Central journal article supplement (PMC8103266; doi:10.3390/diseases9020025), 2021-03-29
Supplement: diseases-09-00025-s001.pdf [file diseases-09-00025-s001.pdf]

**Box plot analysis**

The variability of the NLAI subscales was analyzed. Below are the box plots for the NH, MA, HFM, FLN, and FG scores are presented. As the box plots illustrate the scores are not quite different between the two BMI categories with good variability. In the text the median and IQR are reported which reflects the variability in the data and the indication of the results is explained in the results section

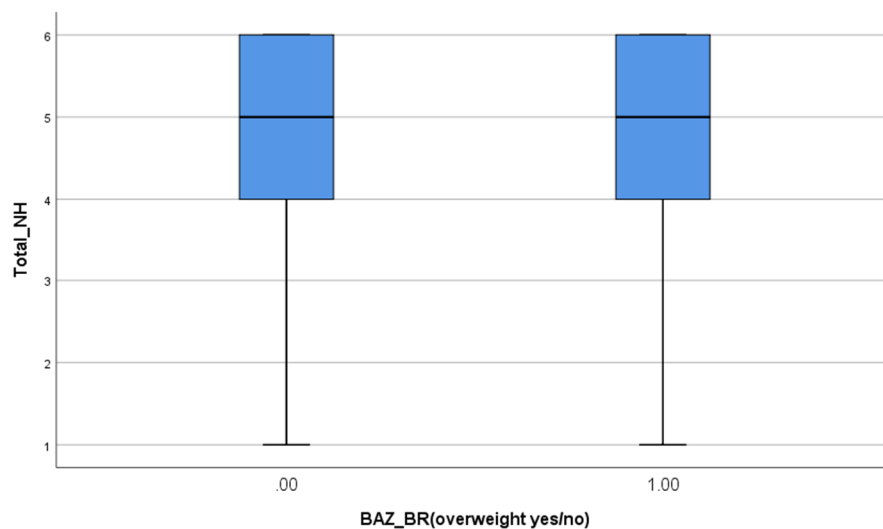

**Figure S1. Box plot for total Nutrition and Health (NH)score by BAZ score category.**

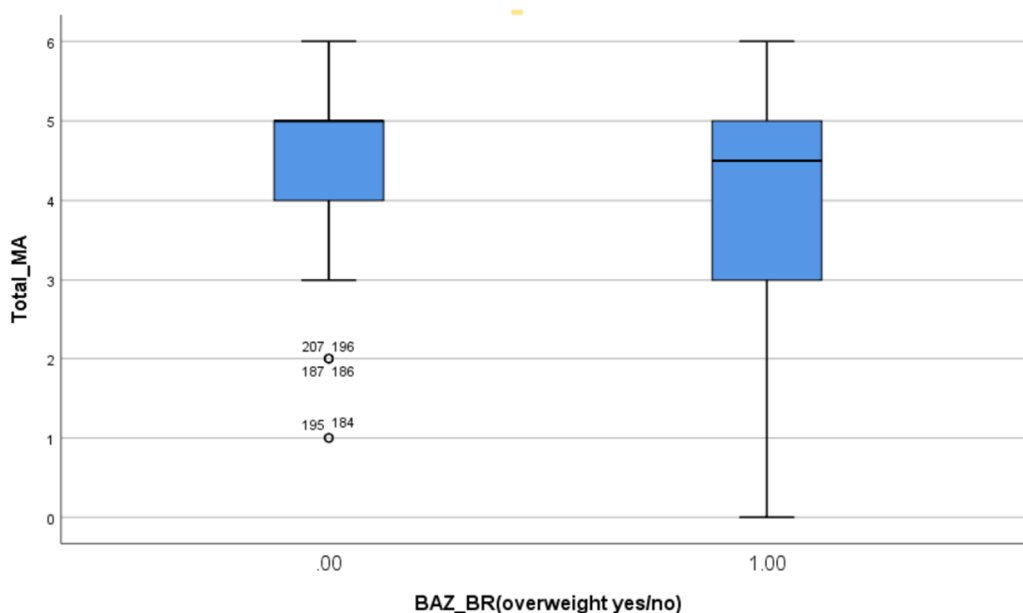

**Figure S2. Box plot for total Macronutrient (MA) score by BAZ score category.**

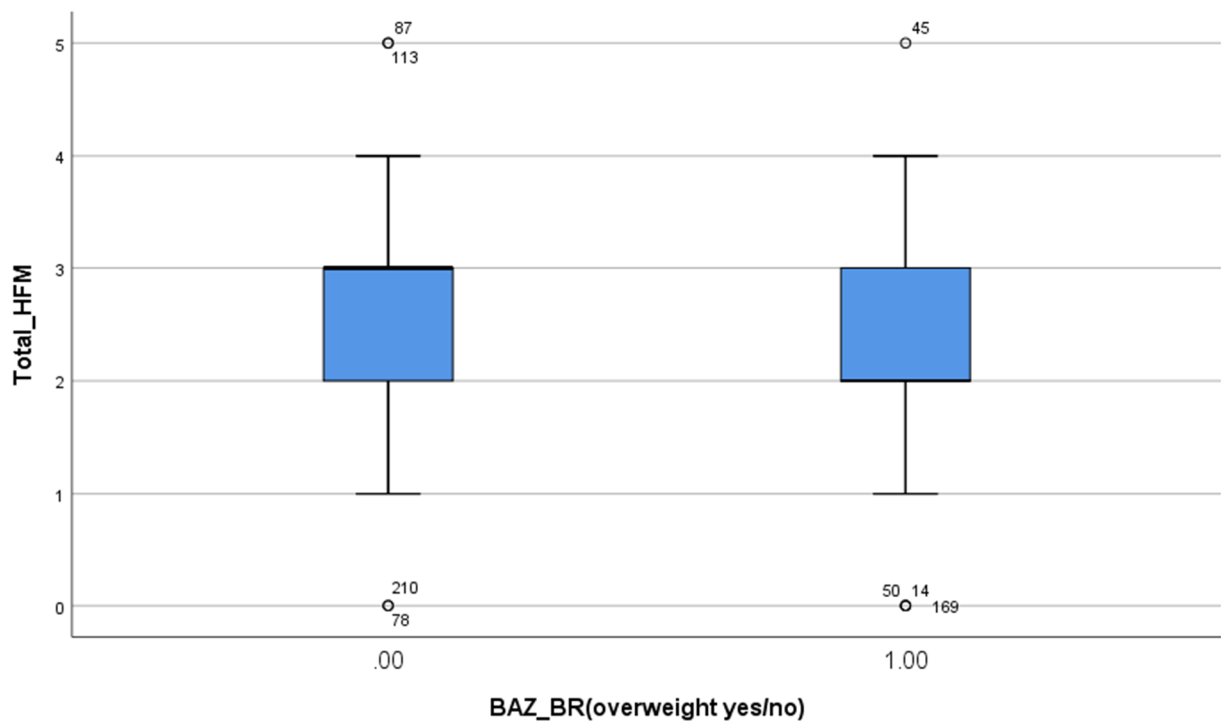

Figure S3. Box plot for total Household Food Measurement (HFM) score by BAZ score category.

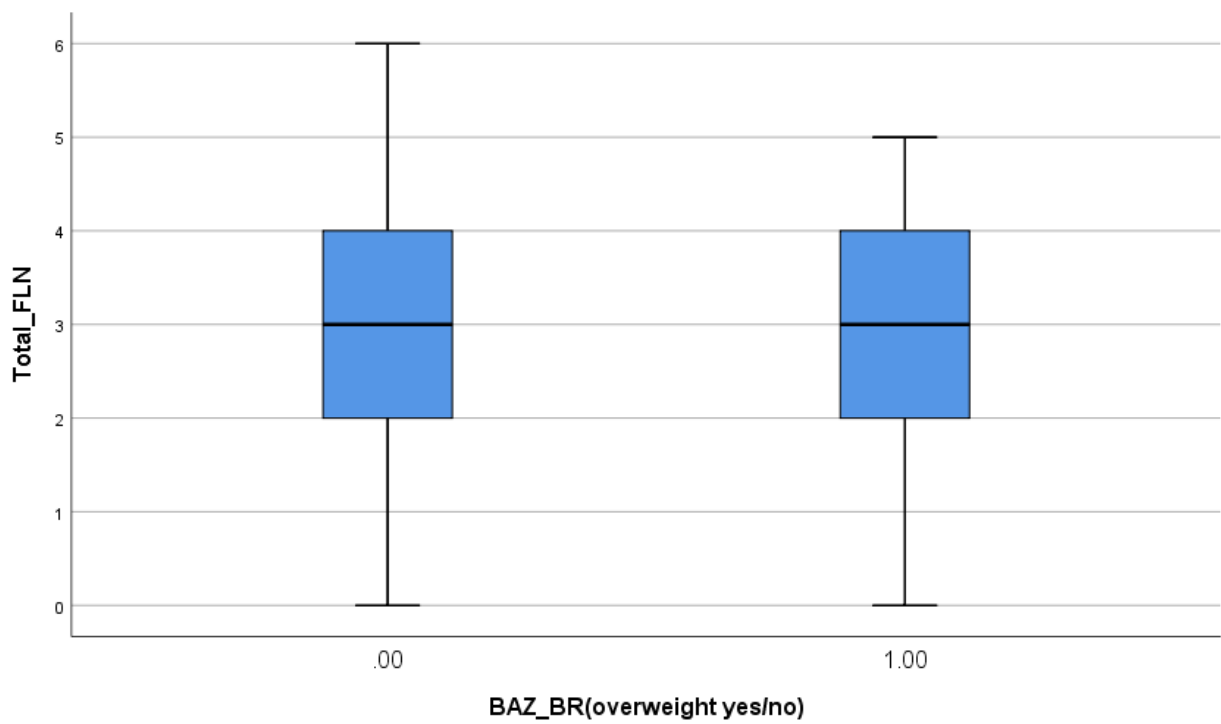

Figure S4. Box plot for total Food Label and Numeracy (FLN) score by BAZ score category.

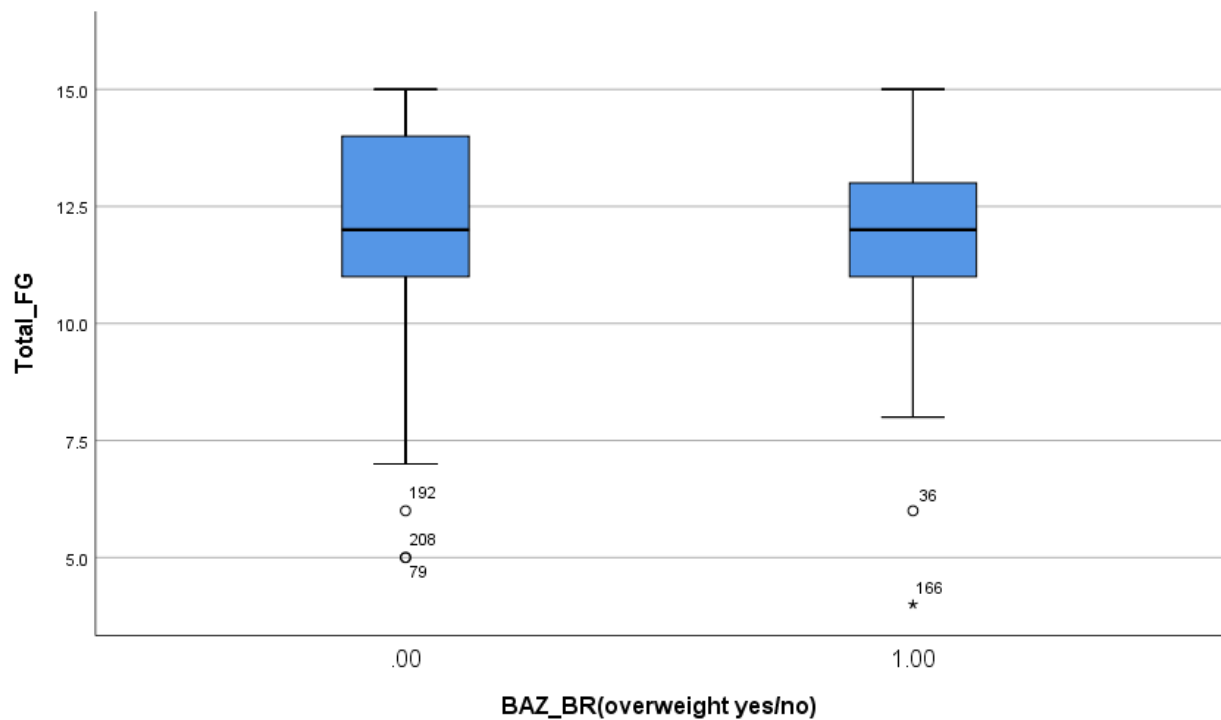

Figure S5. Box plot for total Food Group (FG) score by BAZ score category.

### Reliability analysis

Cronbach's alpha was calculated for each nutrition literacy scale. A scale with less than 10 items tend to give low Cronbach's alpha. Loewenthal [1] and Cortina [2] have justified that the alpha coefficient can be lower if the scale had fewer than 10 items due to the profound effect a small number of items have on the alpha value (maximum number of items in this study is 6 items for each scale). Values for Cronbach's alpha are presented below for each scale and items.

Table S1. NH scale.

| Item-Total Statistics               |                            |                                |                                  |                              |                                  |
|-------------------------------------|----------------------------|--------------------------------|----------------------------------|------------------------------|----------------------------------|
|                                     | Scale Mean if Item Deleted | Scale Variance if Item Deleted | Corrected Item-Total Correlation | Squared Multiple Correlation | Cronbach's Alpha if Item Deleted |
| NH_1_S                              | 3.7725                     | 1.464                          | 0.152                            | 0.079                        | 0.496                            |
| NH_2_S                              | 3.8889                     | 1.280                          | 0.160                            | 0.100                        | 0.486                            |
| NH_3_S                              | 3.9947                     | 1.016                          | 0.371                            | 0.149                        | 0.371                            |
| NH_4_S                              | 4.1481                     | 1.010                          | 0.269                            | 0.115                        | 0.439                            |
| NH_5_S                              | 3.9206                     | 1.169                          | 0.263                            | 0.089                        | 0.438                            |
| NH_6_S                              | 4.0847                     | 1.003                          | 0.308                            | 0.111                        | 0.410                            |
| <b>Total scale Cronbach's alpha</b> |                            |                                |                                  |                              | <b>0.491</b>                     |

**Table S2.** MA scale.

| <b>Item-Total Statistics</b>        |                            |                                |                                  |                              |                                  |
|-------------------------------------|----------------------------|--------------------------------|----------------------------------|------------------------------|----------------------------------|
|                                     | Scale Mean if Item Deleted | Scale Variance if Item Deleted | Corrected Item-Total Correlation | Squared Multiple Correlation | Cronbach's Alpha if Item Deleted |
| MA_1_S                              | 3.4709                     | 1.304                          | 0.185                            | 0.083                        | 0.402                            |
| MA_2_S                              | 3.4868                     | 1.219                          | 0.280                            | 0.119                        | 0.356                            |
| MA_3_S                              | 3.6878                     | 1.067                          | 0.246                            | 0.092                        | 0.363                            |
| MA_4_S                              | 3.4392                     | 1.269                          | 0.330                            | 0.150                        | 0.353                            |
| MA_5_S                              | 3.8413                     | 1.092                          | 0.172                            | 0.053                        | 0.420                            |
| MA_6_S                              | 3.9259                     | 1.112                          | 0.154                            | 0.058                        | 0.432                            |
| <b>Total scale Cronbach's alpha</b> |                            |                                |                                  |                              | <b>0.431</b>                     |

**Table S3.** HFM scale.

| <b>Item-Total Statistics</b>        |                            |                                |                                  |                              |                                  |
|-------------------------------------|----------------------------|--------------------------------|----------------------------------|------------------------------|----------------------------------|
|                                     | Scale Mean if Item Deleted | Scale Variance if Item Deleted | Corrected Item-Total Correlation | Squared Multiple Correlation | Cronbach's Alpha if Item Deleted |
| HFM_1_S                             | 2.3915                     | 1.250                          | 0.103                            | 0.041                        | 0.073                            |
| HFM_2_S                             | 2.5503                     | 1.121                          | 0.178                            | 0.168                        | -0.013 <sup>a</sup>              |
| HFM_3_S                             | 2.6032                     | 1.187                          | 0.108                            | 0.045                        | 0.062                            |
| HFM_4_S                             | 2.8730                     | 1.760                          | -0.341                           | 0.247                        | 0.400                            |
| HFM_5_S                             | 2.5291                     | 1.102                          | 0.203                            | 0.256                        | -0.038 <sup>a</sup>              |
| HFM_6_S                             | 2.6085                     | 1.186                          | 0.109                            | 0.098                        | 0.061                            |
| <b>Total scale Cronbach's alpha</b> |                            |                                |                                  |                              | <b>0.136</b>                     |

**Table S4.** FLN scale.

| <b>Item-Total Statistics</b>        |                            |                                |                                  |                              |                                  |
|-------------------------------------|----------------------------|--------------------------------|----------------------------------|------------------------------|----------------------------------|
|                                     | Scale Mean if Item Deleted | Scale Variance if Item Deleted | Corrected Item-Total Correlation | Squared Multiple Correlation | Cronbach's Alpha if Item Deleted |
| FLN_1_S                             | 2.2011                     | 1.247                          | 0.070                            | 0.043                        | 0.313                            |
| FLN_2_S                             | 1.9259                     | 1.048                          | 0.216                            | 0.066                        | 0.181                            |
| FLN_3_S                             | 2.0476                     | 1.301                          | -0.027                           | 0.008                        | 0.403                            |
| FLN_4_S                             | 1.9630                     | .951                           | 0.322                            | 0.144                        | 0.067                            |
| FLN_5_S                             | 1.7672                     | 1.158                          | 0.154                            | 0.075                        | 0.244                            |
| <b>Total scale Cronbach's alpha</b> |                            |                                |                                  |                              | <b>0.299</b>                     |

**Table S5.** FG scale.

| <b>Item-Total Statistics</b>        |                            |                                |                                  |                              |                                  |
|-------------------------------------|----------------------------|--------------------------------|----------------------------------|------------------------------|----------------------------------|
|                                     | Scale Mean if Item Deleted | Scale Variance if Item Deleted | Corrected Item-Total Correlation | Squared Multiple Correlation | Cronbach's Alpha if Item Deleted |
| FG_GRAINS_S                         | 3.1799                     | 1.382                          | 0.313                            | 0.143                        | 0.411                            |
| FG_VEGE_S                           | 2.9259                     | 1.548                          | 0.235                            | 0.078                        | 0.456                            |
| FG_FRUIT_S                          | 2.9206                     | 1.520                          | 0.266                            | 0.132                        | 0.440                            |
| FG_MPFBS_S                          | 2.9577                     | 1.626                          | 0.142                            | 0.022                        | 0.505                            |
| FG_DAIRY_S                          | 2.8677                     | 1.488                          | 0.353                            | 0.165                        | 0.398                            |
| FG_FO_S                             | 3.4550                     | 1.622                          | 0.209                            | 0.098                        | 0.468                            |
| <b>Total scale Cronbach's alpha</b> |                            |                                |                                  |                              | <b>0.493</b>                     |

## References

- Loewenthal K. *An introduction to psychological tests and scales*. 2nd ed.; Psychology Press: Philadelphia, PA, USA, 2001.
- Cortina, J.M. What is coefficient alpha? An examination of theory and applications. *J. Appl. Psychol.* **1993**, *78*, 98–104, doi:10.1037/0021-9010.78.1.98.
